# Supplementary material for: Do health and social support and personal autonomy have an influence on the health-related quality of life of individuals with intellectual disability?
Source: PubMed Central journal article supplement (PMC6345008; doi:10.1186/s12913-018-3856-5), 2019-01-23
Supplement: 12913_2018_3856_MOESM1_ESM.pdf [file 12913_2018_3856_MOESM1_ESM.pdf]

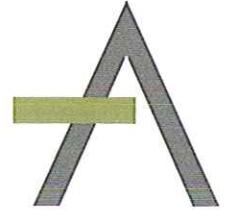

D. JUAN ANTONIO RECIO MOMPÓ, con D.N.I.: 12.367.991-V, domiciliado en Salamanca, c/  
Mariseca, nº 1, como Gerente de ASPRODES con C.I.F.: G-37021946,

CERTIFICA

Que en la sede de la institución se ha llevado a cabo una reunión entre el Equipo de Investigación de la Universidad de Salamanca que dirige el profesor Mirón y los padres y tutores legales de las Personas con Discapacidad Intelectual institucionalizadas en ASPRODES-FEAPS con la finalidad de explicar el objetivo del Proyecto de investigación sobre Calidad de Vida en Personas con Discapacidad Intelectual y, solicitar el **consentimiento informado** para la participación de sus hijos y personas tutorizadas en el mismo y, que se les pueda realizar las entrevistas personales relacionadas con dicho proyecto a los largo de los próximos meses del 2015 y principios del 2016.

Lo que se hace constar a los efectos oportunos de investigación y aspectos éticos relacionados con la elaboración y procesamiento de la información.

Salamanca, a 22 de septiembre de 2015

  
Salamanca  
COOPERATIVA  
C/ Mariseca nº1  
37003 Salamanca  
Teléfono 923 18 68 93  
salarca@asprodes.es  
www.arcagrupo.es
