# Supplementary material for: Do health and social support and personal autonomy have an influence on the health-related quality of life of individuals with intellectual disability?
Source: PubMed Central journal article supplement (PMC6345008; doi:10.1186/s12913-018-3856-5), 2019-01-23
Supplement: 12913_2018_3856_MOESM2_ESM.pdf [file 12913_2018_3856_MOESM2_ESM.pdf]

*TO WHOM IT MAY CONCERN*

Dr. Ignacio DAVILA GONZÁLEZ, Secretary of the Clinical Research Ethics Committee for Clinical Investigation of the University Hospital of Salamanca

CERTIFIES THAT:

The research investigation project entitled: "¿INFLUYE EL APOYO SOCIAL PERCIBIDO Y LA AUTONOMÍA PERSONAL EN LA CALIDAD DE VIDA RELACIONADA CON LA SALUD DE LAS PERSONAS CON DISCAPACIDAD INTELECTUAL?" presented by Dr. JOSÉ ANTONIO MIRÓN CANELO, was submitted to our Ethics Committee.

Salamanca, April 11<sup>th</sup> 2016

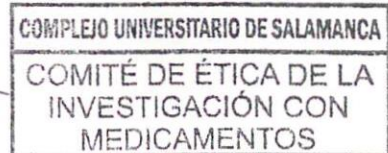

Dr. Ignacio DÁVILA GONZÁLEZ  
Secretary of the Ethics Committee
